# Supplementary material for: Medium-sized Au40(SR)24 and Au52(SR)32 nanoclusters with distinct gold-kernel structures and spectroscopic features
Source: Royal Society of Chemistry journal article supplement (doi:10.1039/c5nr07810e), 2015-12-09
Supplement: c5nr07810e1.pdf [file c5nr07810e1.pdf]

Electronic Supplementary Information  
Medium-Sized  $\text{Au}_{40}(\text{SR})_{24}$  and  $\text{Au}_{52}(\text{SR})_{32}$  Nanoclusters  
with Distinct Gold-Kernel Structure and Spectroscopy  
Features

Wen Wu Xu, Ya Dong Li, Yi Gao\*, Xiao Cheng Zeng\*

\*Corresponding authors. E-mail: gaoyi@sinap.ac.cn, xzeng1@unl.edu

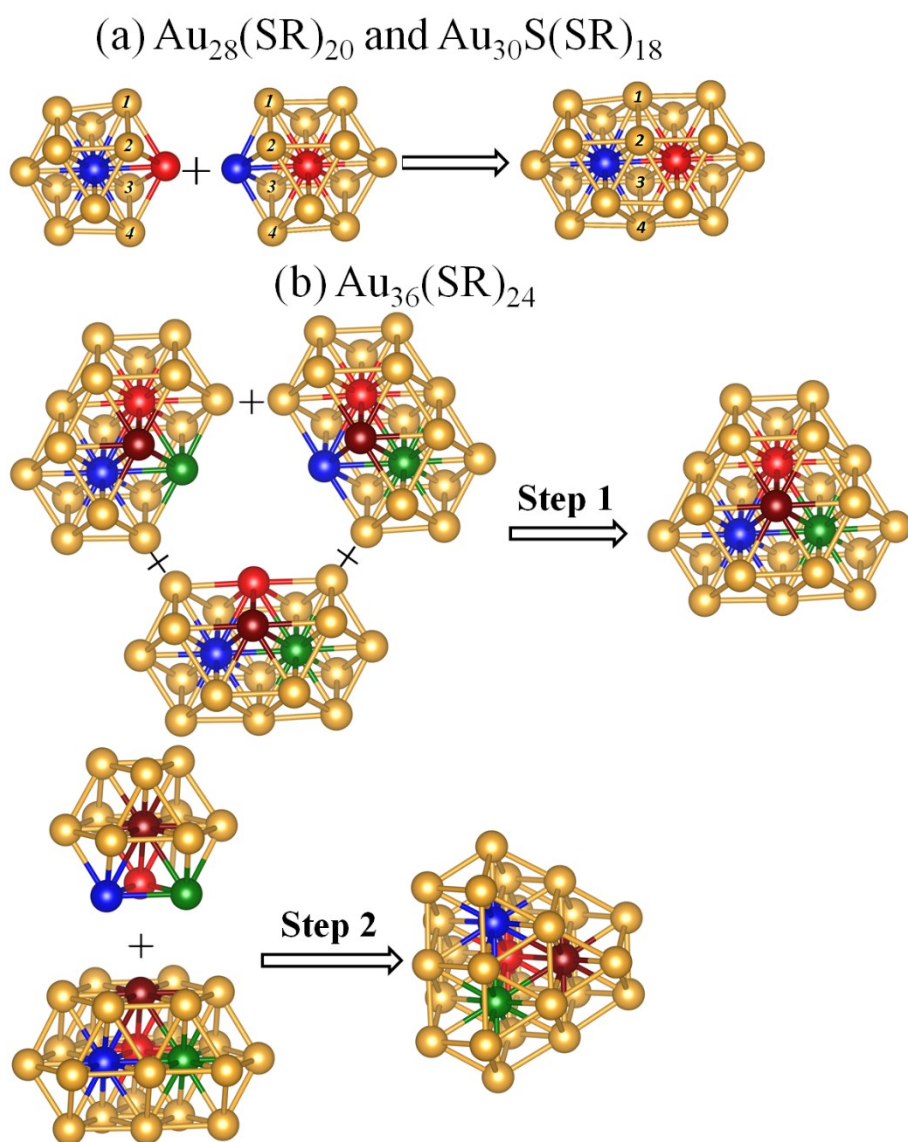

Figure S1. Formation of  $\text{Au}_{20}$  kernel of  $\text{Au}_{28}(\text{SR})_{20}$  and  $\text{Au}_{30}\text{S}(\text{SR})_{18}$  (a), and  $\text{Au}_{28}$  kernel of  $\text{Au}_{36}(\text{SR})_{24}$  (b). The Au atoms marked with the same number and color are fused together.

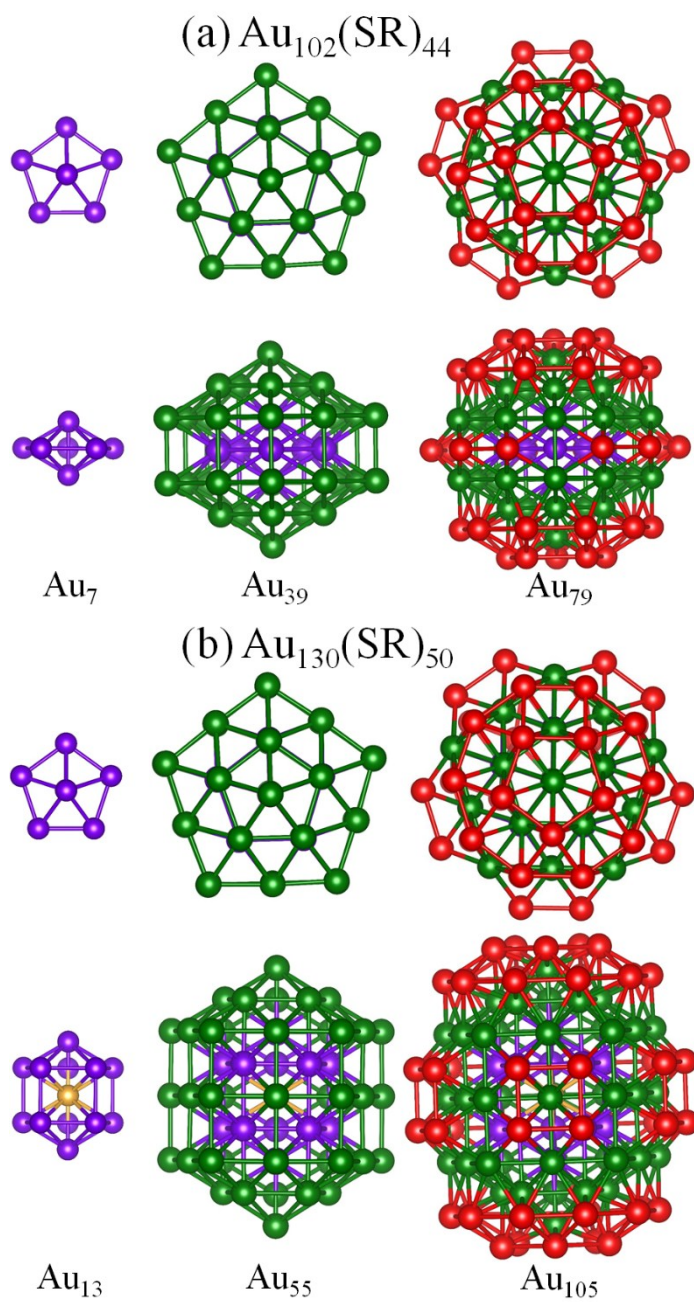

Figure S2. Two orthogonal views of multi-shell Au kernels of  $\text{Au}_{102}(\text{SR})_{44}$  (a) and  $\text{Au}_{130}(\text{SR})_{50}$  (b). All the structures displayed possess Ico-decahedral ( $D_{5h}$ ) symmetry. The shells are shown in different colors.

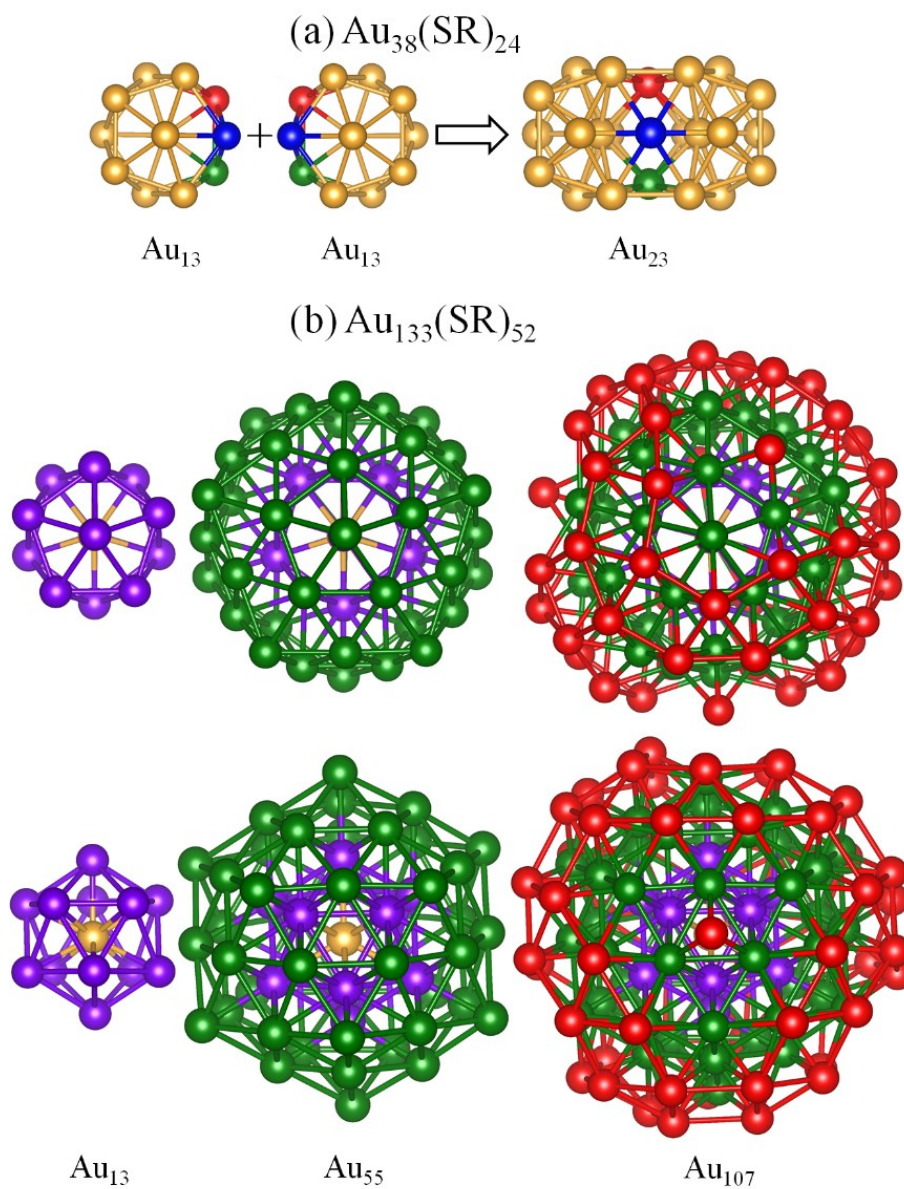

Figure S3. (a) Formation of  $\text{Au}_{23}$  kernel of  $\text{Au}_{38}(\text{SR})_{24}$  by fusing two icosahedral  $\text{Au}_{13}$ . The Au atoms marked with the same color are fused together. (b) Two orthogonal views of multi-shell Au kernel of  $\text{Au}_{133}(\text{SR})_{52}$ . The icosahedral  $\text{Au}_{13}$  (icosahedral  $\text{Au}_{13}$  is also the kernel of  $\text{Au}_{25}(\text{SR})_{18}$ ) and  $\text{Au}_{55}$  structures are displayed. The shells are shown in different colors.

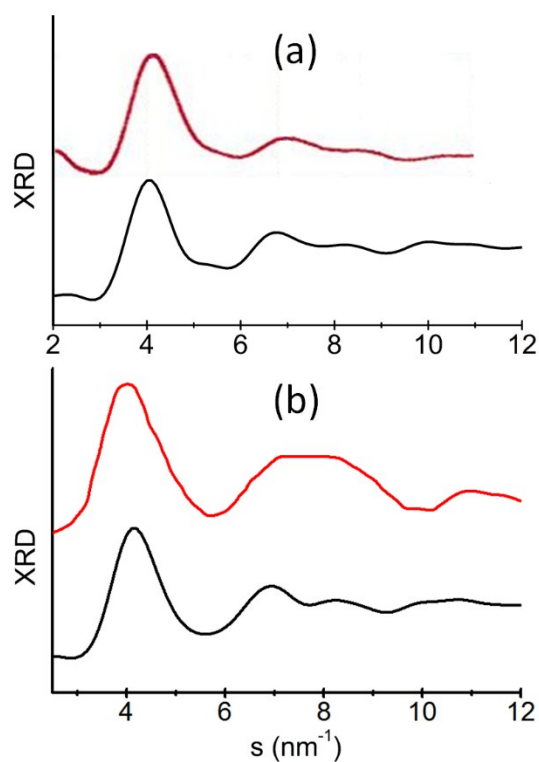

Figure S4. The theoretical (black) and experimental (red) powder X-ray diffraction (XRD) curves of  $\text{Au}_{25}(\text{SR})_{18}$  (a) and  $\text{Au}_{38}(\text{SR})_{24}$  (b). The experimental XRD curves of  $\text{Au}_{25}(\text{SR})_{18}$  and  $\text{Au}_{38}(\text{SR})_{24}$  are adapted from refs. 1 and 2, respectively.

#### Supplemental References

1. Iwasa, T.; Nobusada, K. *J. Phys. Chem. C* 2007, 111, 45.
2. Schaaff, T. G.; Shafiqullin, M. N.; Khoury, J. T.; Vezmar, I.; Whetten, R. L.; Cullen, W. G.; First, P. N.; Gutierrez-Wing, C.; Ascencio, J.; Jose-Yacaman, M. *J. J. Phys. Chem. B* 1997, 101, 7885.
